# Supplementary figures and images for: Impact of Pneumococcal Conjugate Vaccination of Infants on Pneumonia and Influenza Hospitalization and Mortality in All Age Groups in the United States
Source: PubMed Central journal article supplement — mBio. 2011 Jan 25;2(1):e00309-10. doi: 10.1128/mBio.00309-10 (PMC3025524; doi:10.1128/mbio.00309-10), 2011-01-25

Supplemental Figure 1.

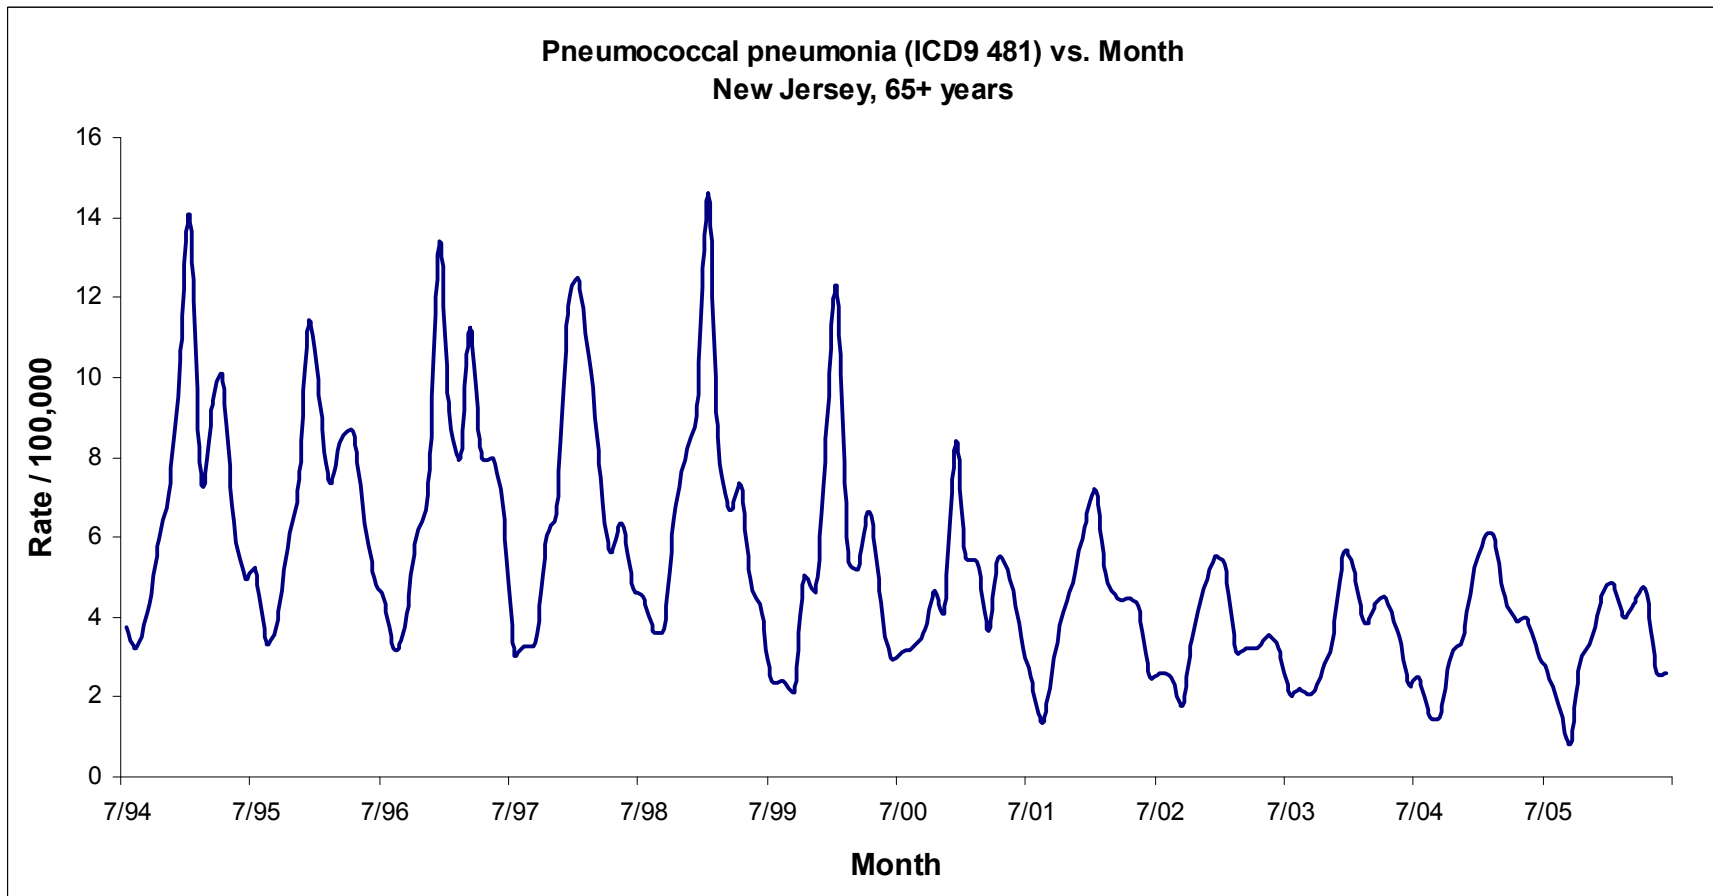

Supplement: mBio00309-10-sf01.pdf [file mBio00309-10-sf01.pdf]

Supplemental Figure 2.

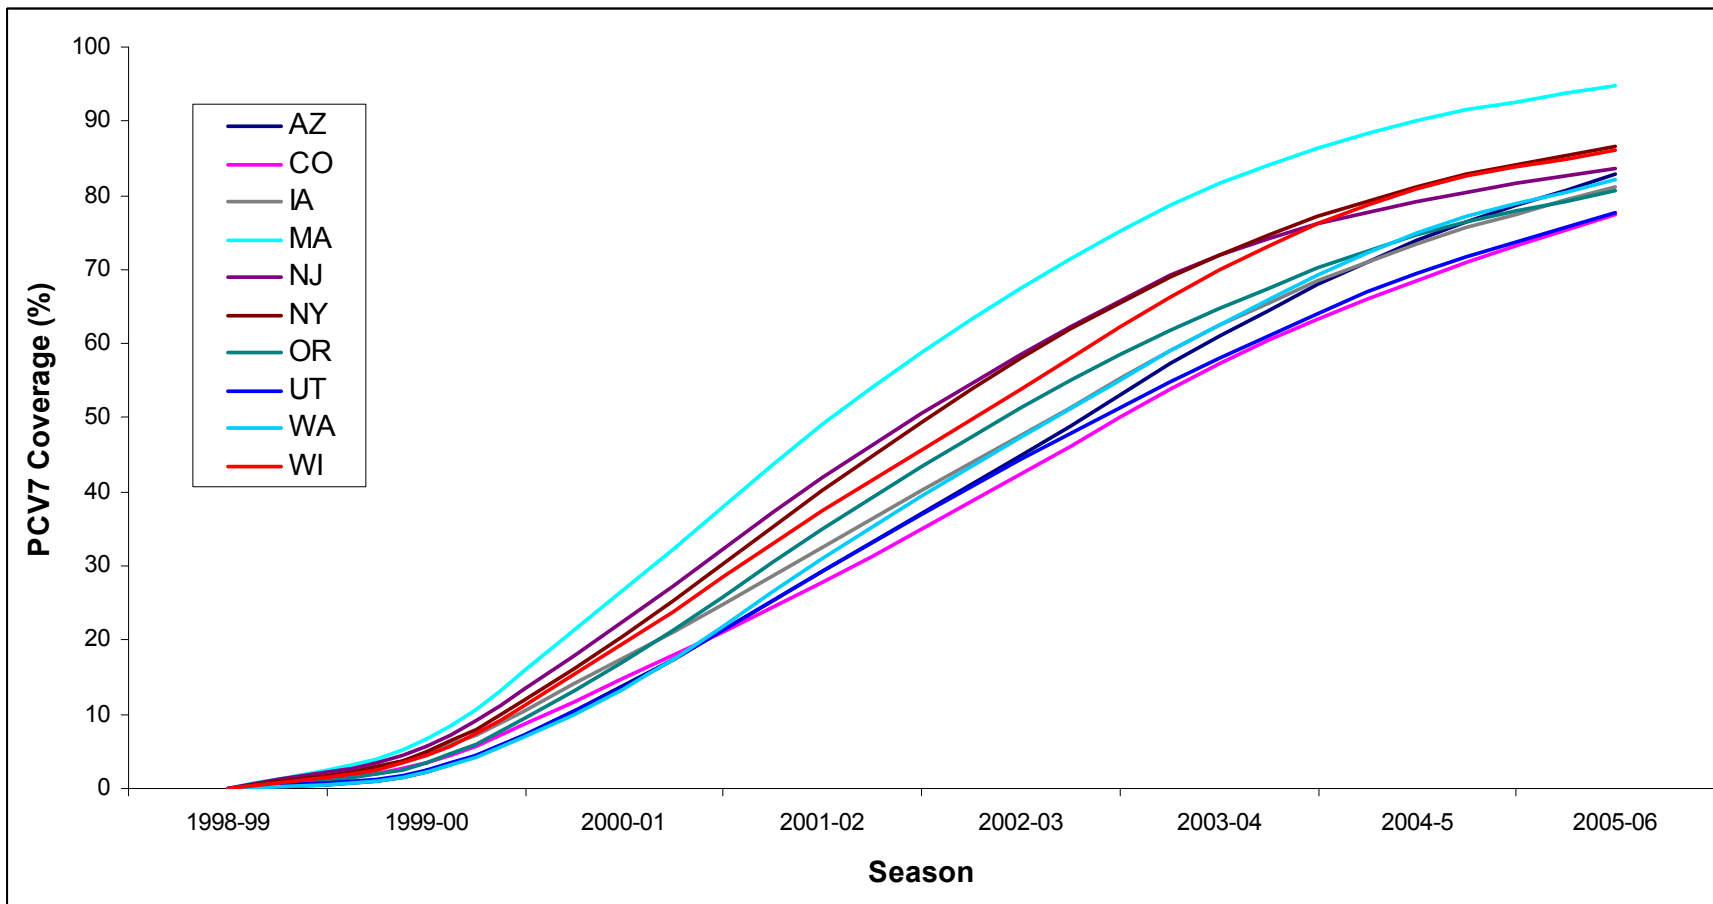

Supplement: mBio00309-10-sf02.pdf [file mBio00309-10-sf02.pdf]

Supplemental Figure 3.

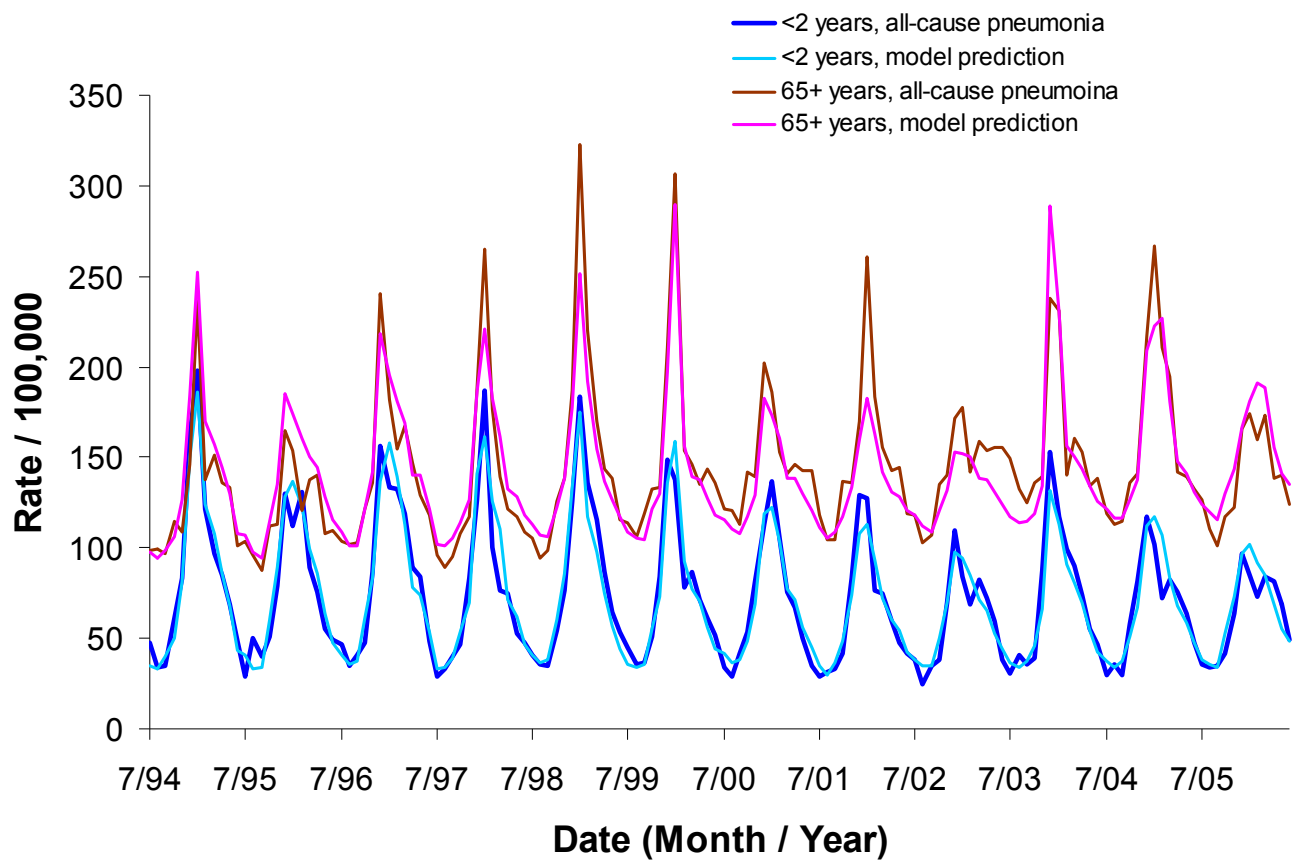

Supplement: mBio00309-10-sf03.pdf [file mBio00309-10-sf03.pdf]

Supplemental Figure 4.

a)

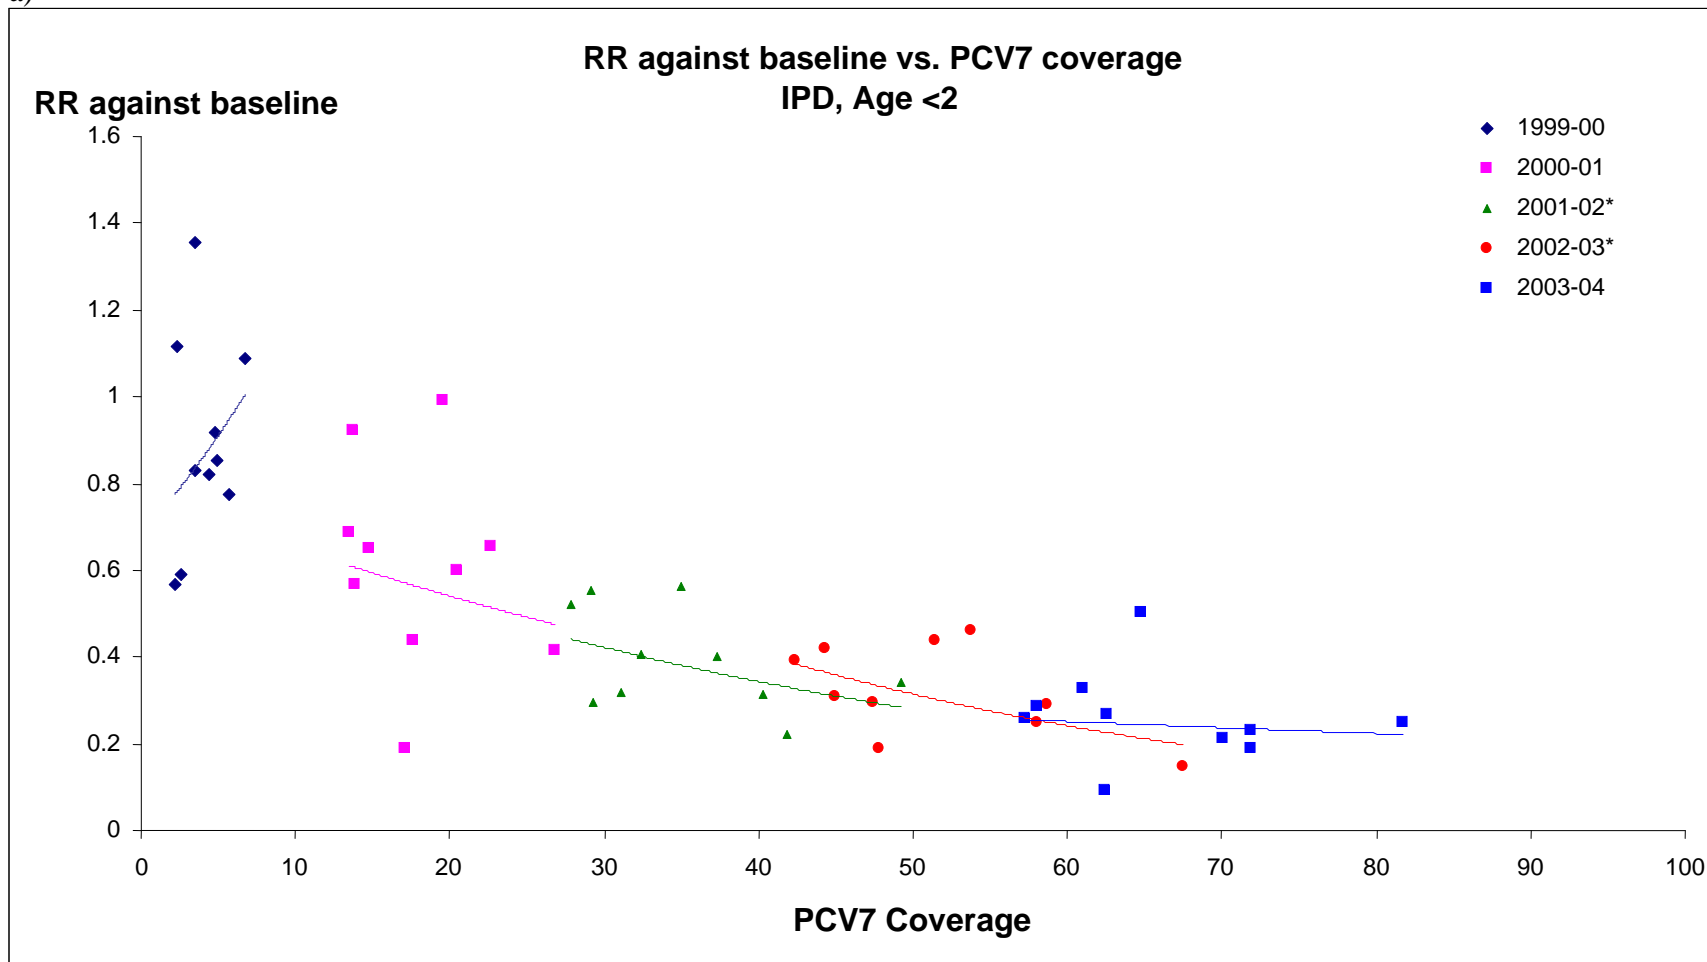

b)

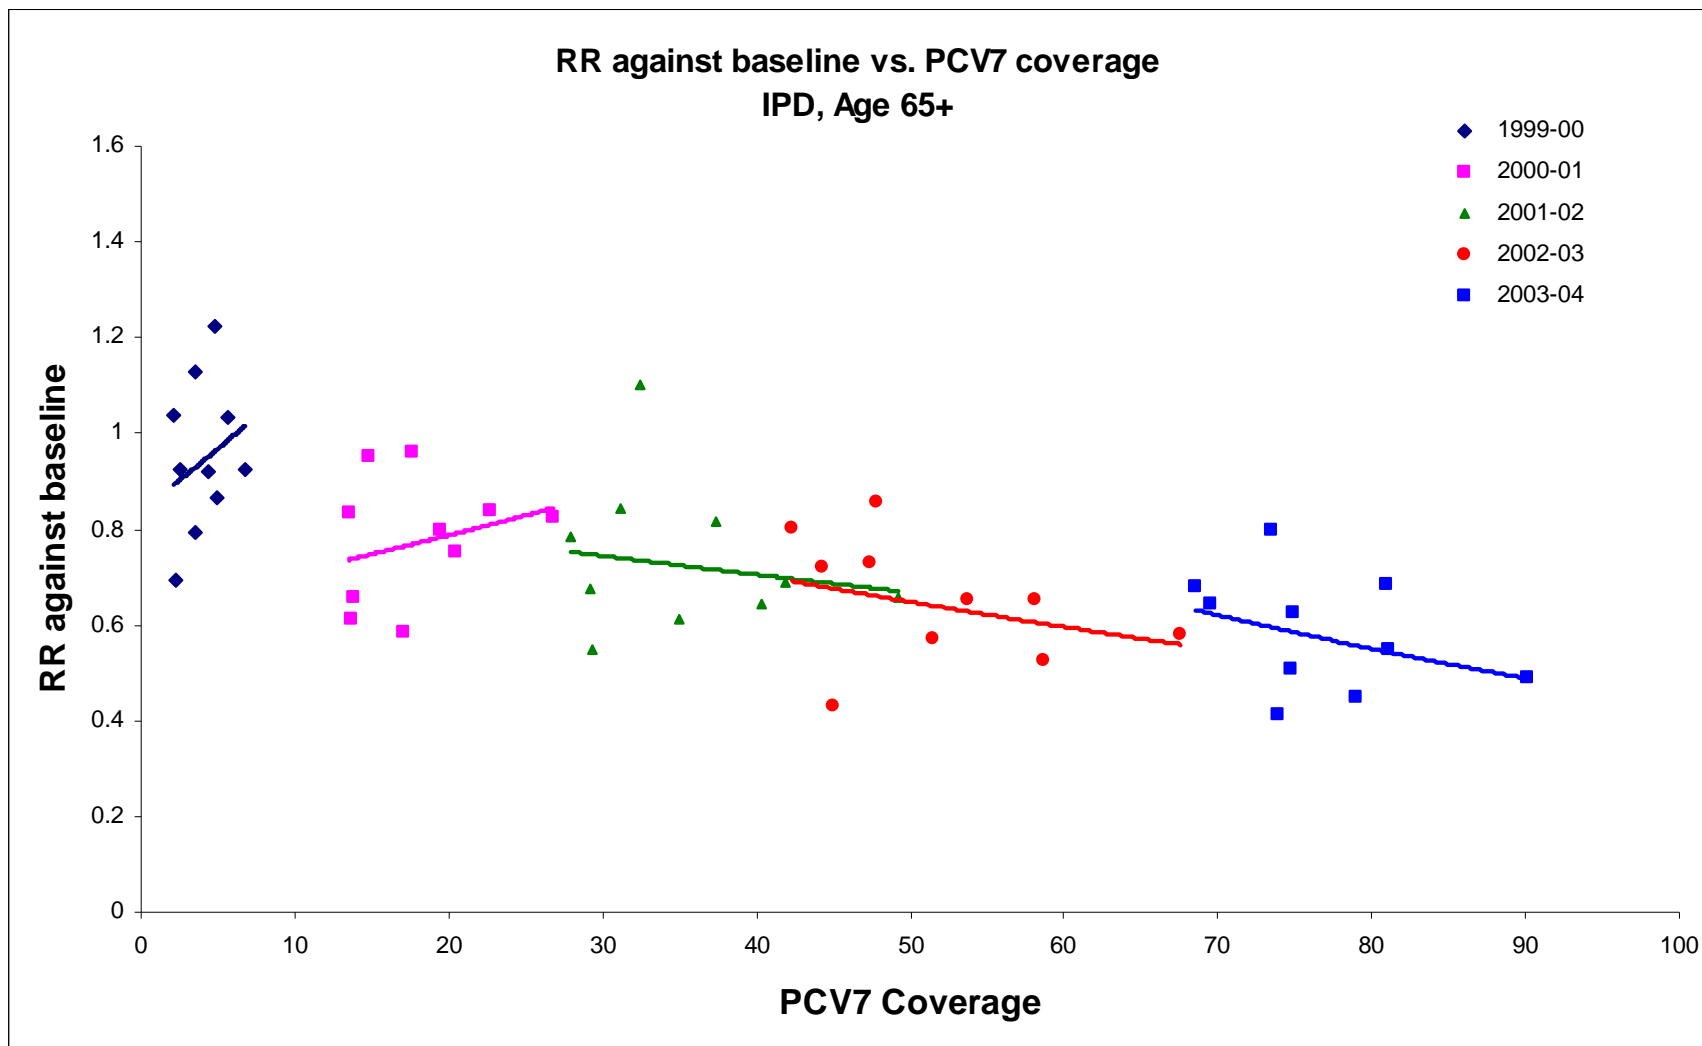

Supplement: mBio00309-10-sf04.pdf [file mBio00309-10-sf04.pdf]
